# Supplementary material for: Diel leaf growth of soybean: a novel method to analyze two-dimensional leaf expansion in high temporal resolution based on a marker tracking approach (Martrack Leaf)
Source: PubMed Central journal article supplement (PMC3750653; doi:10.1186/1746-4811-9-30), 2013-07-25
Supplement: 1746-4811-9-30-S5.pdf [file 1746-4811-9-30-S5.pdf]

**Table 1: Overview of features related to data processing in methods to calculate diel relative growth rates (RGR) of leaves. Limitations of the different setups are underlain in red, optimal usability is highlighted in green:**

|                                                                                                                                        | Morphometric leaf growth | Marker tracking leaf growth analysis | Optical flow based analysis (DISP)  | RRTs / LVDTs      |
|----------------------------------------------------------------------------------------------------------------------------------------|--------------------------|--------------------------------------|-------------------------------------|-------------------|
| Image analysis based algorithm:                                                                                                        | Threshold segmentation   | Tracking of artificial landmarks     | Structure tensor and optical flow   | -                 |
| Temporal Resolution                                                                                                                    | high                     | high                                 | high                                | high              |
| Spatial Resolution                                                                                                                     |                          |                                      | high                                |                   |
| Calculation of local RGRs in regions of interest within the leaf                                                                       | no                       | no                                   | yes                                 | No                |
| Analysis of leaf elongation                                                                                                            | yes                      | no <sup>1</sup>                      | no <sup>2</sup>                     | yes               |
| Analysis of leaf width growth                                                                                                          | yes                      | no <sup>1</sup>                      | no <sup>2</sup>                     | no                |
| Tracking of leaf elongation biased by petiole growth                                                                                   | no                       | no                                   | no <sup>3</sup>                     | yes               |
| Susceptible for changes in brightness                                                                                                  | no                       | no                                   | yes                                 | no                |
| Susceptible for shadows                                                                                                                | no                       | yes                                  | yes                                 | no                |
| Possible to use in field / greenhouse                                                                                                  | yes <sup>4</sup>         | yes                                  | no                                  | yes               |
| Needs high resolution images                                                                                                           | yes (for best quality)   | yes (for best quality)               | yes (for best quality) <sup>5</sup> |                   |
| If temporal resolution can be decreased, image acquisition steps can be skipped to reduce size of image sequences and calculation time | yes                      | yes                                  | no, or at least highly limited      |                   |
| Susceptibility to lossy image and video compression                                                                                    | low                      | low                                  | high                                |                   |
| Optimal to analyze dicot or monocot leaf expansion                                                                                     | dicot                    | dicot                                | dicot                               | monocot and dicot |
| Necessary storage capacity (including calculation results)                                                                             | very low to high         | medium                               | high to very high                   | low               |
| Computing time                                                                                                                         | low                      | medium                               | high                                | very low          |

<sup>1</sup> Dependent on beads arrangement (limited)

<sup>2</sup> Theoretically, but not used so far

<sup>3</sup> Growth of petiole is not allowed to move the leaf too fast

- <sup>4</sup> Robust against illumination changes as seen in field or greenhouses, yet analysis of leaf growth does not allow movement caused for example by wind. As long as those can be prevented (for example in open-top-chambers), outdoor analysis is possible.
- <sup>5</sup> Higher resolutions might give better RGR quality, but number of acquisitions over time must be increased and adjusted, too. For best results, displacements should not exceed one pixel per frame.
